## **A novel, room temperature-stable, multiplexed RT-qPCR assay to distinguish lineage B.1.1.7 from the remaining SARS-CoV-2 lineages**

Viera Kovacova<sup>1,†</sup>, Kristína Boršová<sup>2,3†</sup>, Evan D Paul<sup>1,†</sup>, Monika Radvanszka<sup>1</sup>, Roman Hajdu<sup>1</sup>, Viktória Čabanová<sup>2</sup>, Monika Sláviková<sup>2</sup>, Martina Ličková<sup>2</sup>, Ľubomíra Lukáčiková<sup>2</sup>, Andrej Belák<sup>4,5</sup>, Lucia Roussier<sup>5</sup>, Michaela Kostičová<sup>5,6</sup>, Anna Líšková<sup>7</sup>, Lucia Maďarová<sup>8</sup>, Mária Štefkovičová<sup>9,10</sup>, Lenka Reizigová<sup>9,11</sup>, Elena Nováková<sup>12</sup>, Peter Sabaka<sup>13</sup>, Alena Koščálová<sup>13,14</sup>, Broňa Brejová<sup>15</sup>, Tomáš Vlnar<sup>16</sup>, Jozef Nosek<sup>17</sup>, Pavol Čekan<sup>1,\*</sup>, Boris Klempa<sup>2,\*</sup>

<sup>1</sup> MultiplexDX, Inc., Comenius University Science Park, Bratislava, Slovakia

<sup>2</sup> Biomedical Research Center, Institute of Virology, Slovak Academy of Sciences, Bratislava, Slovakia

<sup>3</sup> Department of Microbiology and Virology, Faculty of Natural Sciences, Comenius University in Bratislava, Bratislava, Slovakia

<sup>4</sup> Institute of Ethnology and Social Anthropology, Slovak Academy of Sciences, Bratislava, Slovakia

<sup>5</sup> Intervention team, Ministry of Health, Slovakia

<sup>6</sup> Institute of Social Medicine and Medical Ethics, Faculty of Medicine, Comenius University in Bratislava, Bratislava, Slovakia

<sup>7</sup> Nitra Faculty Hospital, Department of Clinical Microbiology, Nitra, Slovakia

<sup>8</sup> Regional Authority of Public Health, Banská Bystrica, Slovakia

<sup>9</sup> Regional Authority of Public Health, Trenčín, Slovakia

<sup>10</sup> Faculty of Healthcare, Alexander Dubček University of Trenčín, Slovakia

<sup>11</sup> Department of Laboratory Medicine, Faculty of Healthcare and Social Work, Trnava University, Trnava, Slovakia

<sup>12</sup> Department of Microbiology and Immunology, Comenius University in Bratislava, Jessenius Faculty of Medicine, Martin, Slovakia

<sup>13</sup> Department of Infectology and Geographical Medicine, Faculty of Medicine, Comenius University in Bratislava, Bratislava, Slovakia

<sup>14</sup> Department of Infectious Diseases, Slovak Medical University, Bratislava, Slovakia

<sup>15</sup> Department of Computer Science, Faculty of Mathematics, Physics and Informatics, Comenius University in Bratislava, Bratislava, Slovakia

<sup>16</sup> Department of Applied Informatics, Faculty of Mathematics, Physics and Informatics, Comenius University in Bratislava, Bratislava, Slovakia

<sup>17</sup> Department of Biochemistry, Faculty of Natural Sciences, Comenius University in Bratislava, Bratislava, Slovakia

† These authors contributed equally

\* Correspondence to: [boris.klempa@savba.sk](mailto:boris.klempa@savba.sk)

\* Correspondence to: [pavol@multiplexdx.com](mailto:pavol@multiplexdx.com)

Key words: B.1.1.7 lineage, 20I/501Y.V1, Variant of Concern (VOC) 202012/01, SARS-CoV-2, COVID-19, RT-qPCR, spike gene, spike protein, coronavirus

NOTE: This preprint reports new research that has not been certified by peer review and should not be used to guide clinical practice.

## Abstract

The recent emergence of a novel variant of SARS-CoV-2 called lineage B.1.1.7 has sparked global alarm due to evidence of increased transmissibility, mortality, and uncertainty about vaccine efficacy, thus accelerating worldwide efforts to detect and track the variant. Current approaches to detect the B.1.1.7 variant include sequencing and molecular tests that contain a target assay that fails or results in reduced sensitivity towards the B.1.1.7 variant. Since many countries lack a robust genomic surveillance program and the failed target assays detect multiple unrelated variants that contain similar mutations as B.1.1.7, there is an urgent need to develop molecular tests that can accurately and rapidly identify the B.1.1.7 variant. We have developed a room temperature-stable, multiplexed RT-qPCR test that readily differentiates the B.1.1.7 variant from the most common SARS-CoV-2 variants. The test consists of two assays that target either the common SARS-CoV-2 spike gene or the two deletions in the spike gene ( $\Delta$ H69/ $\Delta$ V70 and  $\Delta$ Y144) that are present in the B.1.1.7 variant. Moreover, a simple relative comparison of the Ct values of the two assays permits not only identification of the B.1.1.7 variant but also its differentiation from other variants that harbor only the  $\Delta$ H69/ $\Delta$ V70 deletion. Each assay is multiplexed with a human RNase P internal control to assess RNA extraction and assay performance. This test can easily be implemented in diagnostic labs to rapidly scale B.1.1.7 surveillance efforts and is particularly useful in countries with high prevalence of variants possessing only the  $\Delta$ H69/ $\Delta$ V70 deletion because current strategies using target failure assays incorrectly identify these as putative B.1.1.7 variants.

## Introduction

In Dec 2020, Rambaut et al. <sup>1</sup> reported the genomic characterization of a distinct phylogenetic cluster named lineage B.1.1.7, also referred to as 20I/501Y.V1 by Nextstrain (<https://nextstrain.org/sars-cov-2/>) or Variant of Concern (VOC) 202012/01, briskly spreading over the past four weeks in the United Kingdom. The new lineage has 23 mutations: 13 non-synonymous mutations, 4 deletions, and 6 synonymous mutations. The spike protein contains ten mutations at the amino-acid level ( $\Delta$ H69/ $\Delta$ V70 and  $\Delta$ Y144 deletions, N501Y, A570D, D614G, P681H, T716I, S982A, D1118H) that could potentially change binding affinity of the virus <sup>2-4</sup> and consequently virus-host interaction. Indeed, emerging evidence suggests lineage B.1.1.7 has enhanced transmissibility <sup>3,5-8</sup>, results in higher viral loads <sup>9,10</sup>, and causes increased mortality <sup>11</sup>. These data highlight the need for tools to facilitate enhanced surveillance of lineage B.1.1.7 as well as other variants that may harbor spike gene mutations that alter viral dynamics.

The dominant approach used to putatively detect lineage B.1.1.7 involves conducting multigene RT-qPCR tests that result in positive detection of SARS-CoV-2 in one or more gene sets together with a so-called S gene target failure (SGTF), which is used as a proxy for the B.1.1.7 variant. This approach permits widespread, rapid screening, but is limited by the fact that other variants, in addition to the lineage B.1.1.7, produce SGTFs. Thus, the SGTF screening method depends on the presence of other variants in a region and how they vary over time. The gold-standard for detection of the B.1.1.7 variant is through whole genome sequencing. This provides direct confirmation of the variant and identification of emerging variants; however, it is expensive, time consuming, low throughput, and many countries lack a robust genomic surveillance program, making this approach unwieldy to adopt for mitigating the spread of the B.1.1.7 variant.

Here, we report for the first time, the development of a novel, room temperature-stable, and multiplexed RT-qPCR test for differentiating lineage B.1.1.7 from all other SARS-CoV-2 lineages. The assay has been validated on clinical samples verified by sequencing to be positive for lineage B.1.1.7. Unlike other tests that rely on indirect detection via SGTF, this test contains primers that target the  $\Delta$ H69/ $\Delta$ V70 and  $\Delta$ Y144 deletions in the spike gene that permit the direct detection of lineage B.1.1.7. This RT-qPCR assay will provide a useful tool for countries to rapidly identify hot spots of this new B.1.1.7 variant and implement test, trace, and isolate strategies to prevent this variant from becoming widespread. This test would be particularly useful in countries currently experiencing extensive circulation of variants carrying

only the  $\Delta H69/\Delta V70$  deletion as these would be via SGTF falsely identified as the B.1.1.7 variant.

## Materials and Methods

### *Analysis of sequences*

To identify suitable targets for primer/probe design, we downloaded 1,136 sequences from the GISAID repository filtered during a collection time spanning 1 - 21 December 2020. We focused on the spike gene because lineage B.1.1.7 contains a number of spike gene mutations, including two deletions ( $\Delta H69/\Delta V70$  and  $\Delta Y144$ ) that are ideal for designing a specific assay. We cut the locus encoding the spike protein and used the MAFFT alignment tool (with the parameter - auto)<sup>12</sup> to align all the sequences against the WUHAN reference (NCBI ID: NC\_045512.2). Twelve sequences (1.06 %) contained ambiguous signal in the loci of deletions and were not used in the downstream analysis. We separated sequences into two groups: 1) those with the  $\Delta H69/\Delta V70$  and  $\Delta Y144$  deletions and 2) those without the deletions (**Table 1**). Using SeaView<sup>13</sup>, we called 95% consensus sequences for the  $\Delta H69/\Delta V70$  and  $\Delta Y144$  group and the No deletions group that were subsequently used to design primer and probe sets specific to either B.1.1.7 or all other SARS-CoV-2 variants, respectively.

In a separate analysis to determine the prevalence of the  $\Delta H69/\Delta V70$  and  $\Delta Y144$  deletions in lineages other than B.1.1.7, we downloaded 416,778 spike protein sequences with the most recent data description file collected from the beginning of the pandemic through 29 January 2021. Using regular expressions (bash pattern matching command grep with the option -P for Perl-compatible regular expression), we searched for loci with both  $\Delta H69/\Delta V70$  and  $\Delta Y144$  deletions and for loci without these deletions. In the regular expression, we kept fixed a few amino acids downstream and upstream from the deletions to omit any miscalling of the searched pattern. All commands and scripts will be available here: <https://github.com/veveMDX/B117-and-B1351-RT-qPCR-test-design>

### *Primer design and synthesis*

We designed primers and probes using the 95% consensus sequences to target both the S gene of the common SARS-CoV-2 and the S gene of SARS-CoV-2 variants containing either the  $\Delta H69/\Delta V70$  deletion or the  $\Delta Y144$  deletion, or both deletions. We incorporated

locked nucleic acid (LNA)-modified bases into some primers and probes following general guidelines in order to normalize melting temperatures, increase sensitivity, and enhance specificity<sup>14–16</sup>. Following primer/probe design, we conducted *in silico* analyses using the IDT OligoAnalyzer™ tool (<https://www.idtdna.com/pages/tools/oligoanalyzer>) to verify melting temperature (T<sub>m</sub>), GC content, and potential to form homo-/hetero-dimers as well as the mFold server<sup>17</sup> (<http://www.bioinfo.rpi.edu/applications/mfold/>) to identify problematic secondary structures or necessary hairpin formation for TaqMan probes. Primers and probes were synthesized at MultiplexDX, Inc. (Bratislava, Slovakia; <https://www.multiplexdx.com/>). The sequences of primers and probes used in this study are listed in **Tables 2 and 3**.

### **Positive controls and clinical samples**

For primer/probe set optimization, we used the following positive controls: 1) RNA extracted from a patient confirmed positive for a common variant of SARS-CoV-2 that does not contain any deletions in the spike gene (named wild type template), 2) RNA extracted from a patient confirmed positive for a common variant of SARS-CoV-2 that contains the six base pair deletion (bp: 21765-21770) resulting in the deletion of two amino acids at the 69/70 position of the spike protein (named  $\Delta$ H69/ $\Delta$ V70 template), and 3) RNA extracted from a patient confirmed positive by whole genome sequencing for the SARS-CoV-2 lineage B.1.1.7 (named B.1.1.7 template). The control samples were confirmed by whole genome sequencing essentially as described by Resende *et al.* (2020)<sup>18</sup>.

All clinical specimens used for clinical validation were previously collected for the purpose of primary diagnosis of SARS-CoV-2 and were made unidentifiable for the researchers performing this study. The study has been approved by the Ethics committee of Biomedical Research Center of the Slovak Academy of Sciences, Bratislava, Slovakia (Ethics committee statement No. EK/BmV-02/2020).

### **RT-qPCR**

We optimized RT-qPCR reactions and conducted clinical validations using both an AriaMx (Agilent, CA, USA) and QuantStudio 5 (ThermoFisher Scientific, MA, USA) real-time PCR system. For all the detected genes, we used the SOLIScript® 1-step CoV Kit (Cat. No. 08-65-00250, SOLIS BioDyne, Tartu, Estonia) according to the manufacturer's recommendations comprised of 4  $\mu$ l of 5X One-step Probe CoV Mix (ROX), 0.5  $\mu$ l of 40X One-step SOLIScript® CoV Mix, 2  $\mu$ l of primers/probe mix, 8.5  $\mu$ l of PCR water, and 5  $\mu$ l of sample in a 20  $\mu$ l total volume. One-step RT-qPCR assays were conducted with the following cycling

conditions: 55 °C for 10 min for reverse transcription, 95 °C for 10 min for initial denaturation, and 45 cycles of 95 °C for 15 s and 60 °C for 30 s. Concentrations for primers and probes were as follows: SARS-CoV-2 S gene (forward and reverse primer = 500 nM, probes = 200 nM for each probe (single and dual)); B.1.1.7: forward primer = 600 nM, reverse primer = 800 nM, probes = 200 nM for each probe (single and dual); RNase P (forward and reverse primer = 250 nM, probe = 80 nM).

### ***Analytical sensitivity (limit of detection)***

To assess the analytical sensitivity of both our common SARS-CoV-2 S gene (S gene) and B.1.1.7 primer/probe sets, we used RNA isolated from a patient sample infected with the B.1.1.7 variant of SARS-CoV-2 as confirmed by sequencing. This RNA was diluted to 200 copies/ $\mu$ l and then serial dilutions were prepared by diluting the stock with a synthetic matrix "SARS-CoV-2 Negative" (Cat. No. COV000, Exact Diagnostics, TX, USA) containing genomic DNA at a concentration of 75,000 copies/ml, resulting in samples with concentrations of 8 copies/ $\mu$ l (= 40 copies/reaction), 2 copies/ $\mu$ l (= 10 copies/reaction), 0.8 copies/ $\mu$ l (= 4 copies/reaction), 0.4 copies/ $\mu$ l (= 2 copies/reaction) and 0.2 copies/ $\mu$ l (= 1 copy/reaction) that were used in the analytical sensitivity test. The assay was performed in 8 replicates for each prepared dilution.

### ***Clinical performance evaluation***

We evaluated the clinical utility of our SARS-CoV-2 S gene and B.1.1.7 primer/probe sets using a selected set of 65 SARS-CoV-2 positive clinical samples, which were confirmed by a reference method used for routine testing by regional public health authorities of the Slovak Republic. Further sequencing revealed 37 of these samples belonging to the B.1.1.7 lineage. The SARS-CoV-2 sequences were determined by sequencing of tiled ~ 2-kbp long amplicons on a MinION device (Oxford Nanopore Technologies, Oxford, UK) as described by Resende et al. (2020) <sup>18</sup>. All sequences have been deposited to the GISAID (<https://www.gisaid.org/>) database (**Table 6**).

## Results

### ***Analysis of sequences***

Our analysis of 1,136 spike gene sequences (spanning 1 - 21 December 2020) revealed 228 sequences (20%) that contained both the  $\Delta H69/\Delta V70$  and  $\Delta Y144$  deletions (for country of origin, see **Table 1**). The shorter deletion ( $\Delta Y144$ ) always co-occurred with the longer deletion ( $\Delta H69/\Delta V70$ ), whereas the ( $\Delta H69/\Delta V70$ ) deletion occurs independently in 17 sequences (1.5%). Pearson's correlation coefficient of the deletions is 0.953.

Analysis of the prevalence of both  $\Delta H69/\Delta V70$  and  $\Delta Y144$  deletions in lineages other than B.1.1.7 revealed a total of 29,872 sequences that possess both deletions, while 368,474 sequences do not have them. Based on the metadata file, we identified SARS-CoV-2 lineages across all called sequences with both deletions. Only five sequences (0.0167%) out of 29,872 records are not labelled as B.1.1.7. In other words, 99.98% of sequences containing both deletions belong to lineage B.1.1.7, highlighting the notion that these two deletions are highly specific for the B.1.1.7 variant and make ideal targets for primer/probe design.

### ***Optimization of a S gene primer/probe set targeting both common SARS-CoV-2 and $\Delta H69/\Delta V70$ deletion variants***

We began by designing a general S gene primer/probe assay (SARS-CoV-2 S gene) that could be used for screening purposes and would detect the most common strains of SARS-CoV-2 as well as variants containing the  $\Delta H69/\Delta V70$ , including lineage B.1.1.7. We designed a series of primers flanking the  $\Delta H69/\Delta V70$  deletion and tested their performance during RT-qPCR using the wild type and  $\Delta H69/\Delta V70$  templates (for primer/probes sequences, see **Table 2**). Although all primers/probe combinations amplified both wild type (**Figure 1A**) and  $\Delta H69/\Delta V70$  (**Figure 1B**) templates, we selected the F1-P3-R1 set for further analysis since it resulted in the lowest overall Ct values and sufficient fluorescence intensity.

### ***Dual probes enhance fluorescence intensity and sensitivity***

Given that prior reports suggest that including a second TaqMan hydrolysis probe can be beneficial for specificity and sensitivity<sup>19,20</sup>, we designed an additional hydrolysis probe (P4), identically labelled with the same reporter and quencher dyes, that would hybridize in tandem (i.e., on the same strand) with the first hydrolysis probe (P3). We compared single versus dual hydrolysis probe assays using three 10-fold dilutions of template RNA and



observed that dual probes resulted in greater fluorescent intensity at all dilutions (**Figure 1C**) as well as reduced Ct values at the first two dilutions (**Figure 1D**). Moreover, the efficiency of the RT-qPCR reaction was similar between single and dual probe assays. Therefore, we decided to incorporate dual probes into our SARS-CoV-2 S gene primer/probe set (F1-P3-P4-R1; **Table 2**)

### ***Optimization of a S gene primer/probe set capable of differentiating between lineage B.1.1.7 and other SARS-CoV-2 variants***

Lineage B.1.1.7 contains two deletions in the spike gene, including a six base pair deletion (bp: 21765-21770;  $\Delta$ H69/ $\Delta$ V70) and three base pair deletion (bp: 21991-21993;  $\Delta$ Y144). Since the co-occurrence of these deletions is highly specific to B.1.1.7 (99.98%), we selected these deletions as candidate regions to target for a primer/probe set to differentiate B.1.1.7 from all other SARS-CoV-2 variants (see **Table 3** for primer and probe sequences). Our first approach consisted of designing several probes targeting the first deletion and determining specificity by conducting RT-qPCR using the forward and reverse primers from our SARS-CoV-2 S gene set (F1 and R1) to amplify both wild type and  $\Delta$ H69/ $\Delta$ V70 templates; however, none of the probes were capable of discriminating between wild type and  $\Delta$ H69/ $\Delta$ V70 templates, even though all probes were less efficient at detecting wild type template (**Figure 2A**). We then attempted to differentiate wild type template from  $\Delta$ H69/ $\Delta$ V70 template by designing several forward primers targeting the span of the six base pair deletion. We tested these forward primers using the same probe and reverse primer from our SARS-CoV-2 S gene set (P3 and R1) and found two forward primers (F2 and F3) that specifically amplified only  $\Delta$ H69/ $\Delta$ V70 template (**Figure 2B**). We selected F3 instead of F2 for further assay development based on its sensitivity to  $\Delta$ H69/ $\Delta$ V70 templates, fluorescence intensity, and profile of the amplification curve.

Since other SARS-CoV-2 variants share the  $\Delta$ H69/ $\Delta$ V70 deletion (e.g., B.1.1.298, B.1.160, B.1.177, B.1.258, B.1.375), we next sought to design a series of reverse primers to target the second, three base pair deletion (bp: 21991-21993;  $\Delta$ Y144). This approach would facilitate differentiating B.1.1.7 variants that contain both the  $\Delta$ H69/ $\Delta$ V70 and  $\Delta$ Y144 deletions from SARS-CoV-2 variants that contain only the  $\Delta$ H69/ $\Delta$ V70 deletion. To increase the specificity of the assay, we also utilized allele-specific PCR approaches. We introduced selective mismatch bases in the 3'-end of the primer to destabilize base complementary to sequences that lack the  $\Delta$ Y144 deletion, while retaining complementarity in sequences containing the  $\Delta$ Y144 deletion such as B.1.1.7 variants. We designed a series of reverse primers spanning the three base pair deletion (bp: 21991-21993;  $\Delta$ Y144) with and without



LNA-modified oligos to modify stability and tested the ability of these primer/probe sets to amplify three templates: wild type,  $\Delta$ H69/ $\Delta$ V70, and B.1.1.7. While our 3'-LNA-modified primers (R1-R6) were unable to differentiate between B.1.1.7 and  $\Delta$ H69/ $\Delta$ V70, several unmodified primers displayed reduced sensitivity towards  $\Delta$ H69/ $\Delta$ V70 with a Ct value difference greater than nine when compared with Ct values of B.1.1.7, demonstrating their capability to differentiate the two variants (**Figure 2C**). These primers also showed minimal reductions in sensitivity when compared to Ct values of B.1.1.7 template amplified using SARS-CoV-2 S gene set (**Figure 2D**). This data strongly suggests that the change in Ct value ( $\Delta$ Ct), that is to say, the relative difference in Ct values between the B.1.1.7 and SARS-CoV-2 S gene assays, could be used to confirm the presence of B.1.1.7 when the  $\Delta$ Ct value is minimal (e.g.,  $\Delta$ Ct  $\leq$  5). Alternatively, a larger change in Ct values (e.g.,  $\Delta$ Ct  $\geq$  8) could indicate the presence of a variant that contains the  $\Delta$ H69/ $\Delta$ V70 deletion, but not the  $\Delta$ Y144 deletion.

We also attempted another approach by substituting a mismatched base in the 3'-end of the reverse primer to form a non-canonical base pair that would further destabilize 3'-end complementarity to a greater degree in templates that lack the  $\Delta$ Y144 deletion, a technique which can be useful for detecting single nucleotide polymorphisms<sup>21–23</sup>. These primers (R28-R37) showed the highest specificity with  $\Delta$ H69/ $\Delta$ V70 template amplifying over ten cycles later than B.1.1.7 template (**Figure 2C**). Although some of these reverse primers (R33-35) showed reduced sensitivity when compared to B.1.1.7 template amplified with our common SARS-CoV-2 S gene, we found that judicious placement of an LNA-modified thymine (LNA-T) towards the 3'-end mismatch retained high sensitivity (e.g., R36). This benefit had a limit, however, as placing the LNA-T too close to the mismatch was detrimental to sensitivity (R37; **Figure 2D**). Taken together, several of these primers are capable of discriminating between B.1.1.7 and other variants containing the  $\Delta$ H69/ $\Delta$ V70 deletion, provided that a second reaction is ran in parallel using the SARS-CoV-2 S gene set that can be used as a benchmark to assess the relative sensitivity. If the B.1.1.7 primer set amplifies the sample within five Ct cycles of the SARS-CoV-2 S gene primer set, then the sample is B.1.1.7 positive. Alternatively, if the B.1.1.7 primer set amplifies the sample in 8 or more Ct cycles relative to the SARS-CoV-2 S gene primer set, then the sample likely belongs to a variant that contains the  $\Delta$ H69/ $\Delta$ V70 deletion, but not the  $\Delta$ Y144 deletion, and hence is B.1.1.7 negative.

### **Comparison of B.1.1.7 S gene primer/probe sets**

Following the clinical validation, we compared three different versions of B.1.1.7 primer/probe sets that varied according to the reverse primer (V1, V2, and V3 use reverse primers R14, R23, and R36, respectively) using a selected set of 46 samples, some of which

where sequenced to confirm lineage status. Given our interpretation criterion (**Table 4**), we determined that the V3 primer/probe set (F3-P3-P4-R36) performed the best since it correctly identified all B.1.1.7 and  $\Delta$ H69/ $\Delta$ V70 deletion samples, with the exception of one  $\Delta$ H69/ $\Delta$ V70 deletion sample that was interpreted as inconclusive (**Figure 3**). While V1 and V2 primer/probe sets correctly identified all B.1.1.7 samples, they performed poorly at calling  $\Delta$ H69/ $\Delta$ V70 deletion samples. V1 correctly identified only 11 samples, whereas V2 performed better by correctly identifying 30 samples. Sequencing results on all B.1.1.7 samples and a subset (n=12) of  $\Delta$ H69/ $\Delta$ V70 deletion samples confirmed their lineage designation. Among the  $\Delta$ H69/ $\Delta$ V70 deletion samples that were sequenced, the V1, V2, and V3 primer/probes sets detected 25%, 67%, and 92%, respectively, of the samples identified as lineage B.1.258, thus confirming V3 as the most suitable primer/probe combination to identify other lineages containing only the  $\Delta$ H69/ $\Delta$ V70 deletion.

#### ***Analytical sensitivity and clinical evaluation of lineage B.1.1.7 S gene primer/probe set***

With our final primer/probe sets for SARS-CoV-2 S gene and B.1.1.7, we multiplexed each assay with the US CDC human RNase P primer/probe set (for sequence, see <sup>24</sup>) as an internal control to assess RNA extraction and assay performance. We then assessed the analytical sensitivity using serial dilutions of RNA extracted from a B.1.1.7 positive sample. Both assays displayed high sensitivity (**Figure 4A**) with our SARS-CoV-2 S gene and B.1.1.7 assays reliably detecting down to only 2 copies/reaction (0.4 copies/ $\mu$ l) and 10 copies/reaction (2 copies/ $\mu$ l), respectively, placing them among the most sensitive SARS-CoV-2 RT-qPCR assays available.

We evaluated the clinical performance of our SARS-CoV-2 S gene and B.1.1.7 assays on 65 clinical samples that underwent sequencing to identify lineage status using interpretation criterion outlined in **Table 4**. Our SARS-CoV-2 S gene assay detected all 65 clinical samples regardless of lineage (**Table 5**) confirming its utility as a general screening assay for the most common SARS-CoV-2 variants. Out of 37 clinical samples classified as lineage B.1.1.7 by sequencing, our B.1.1.7 assay positively identified 36 samples, while only one sample was deemed inconclusive. The  $\Delta$ Ct of this sample was slightly greater than five cycles (e.g., Sample 40,  $\Delta$ Ct = 5.7) relative to the Ct value for the SARS-CoV-2 S gene assay, which exceeded our cut-off for a positive identification (**Figure 4B**).

Notably, our assay was also capable of identifying samples carrying the  $\Delta$ H69/ $\Delta$ V70 deletion such as those belonging to the B.1.258 lineage, provided that the sample contains sufficient viral load as other  $\Delta$ H69/ $\Delta$ V70 variants yield  $\Delta$ Ct values greater than 8 Ct cycles. For the 16 samples that carry only the  $\Delta$ H69/ $\Delta$ V70 deletion and belong to lineage B.1.258,

our B.1.1.7 assay correctly identified 13 out of 16 samples. Two samples had relatively high Ct values in the SARS-CoV-2 S gene assay (Sample 33, Ct = 30.1 and Sample 65, Ct = 28.9) and therefore were not detected by the B.1.1.7 assay, making confirmation of the  $\Delta$ H69/ $\Delta$ V70 status impossible with our cut-off criterion. One sample had a  $\Delta$ Ct outside the criterion for  $\Delta$ H69/ $\Delta$ V70 deletion confirmation and was deemed inconclusive. Detection of human RNase P showed high homogeneity in all analyzed samples, confirming the suitability of this assay as an internal control for collection and RNA extraction from a clinical sample (data not shown). Overall, the clinical evaluation confirmed the diagnostic utility of both our SARS-CoV-2 S gene and B.1.1.7 assays, which showed 100% (65/65) and 97.3% (36/37) diagnostic sensitivity, respectively. For an overview of the clinical evaluation data, lineage of each sample, and GISAID information, see **Table 6**. We have provided a decision tree (**Figure 4C**) that users may follow to implement this research use only test to directly detect the presence of the B.1.1.7 variant.

## Discussion

The recent emergence of a novel SARS-CoV-2 variant called lineage B.1.1.7 has sparked global consternation as it has now been confirmed in over 70 countries and threatens to exacerbate an already dire pandemic. To mitigate the spread of the B.1.1.7 variant, it is imperative that countries have diagnostic tools that can quickly and accurately detect and track the prevalence of the variant in order to implement the appropriate epidemiological measures. Here we report a novel RT-qPCR test to differentiate the B.1.1.7 variant from other SARS-CoV-2 lineages. The test consists of running two S gene target assays, one specific for B.1.1.7 and the other for all SARS-CoV-2 strains, and performing a simple comparison of relative Ct values that allows the user to differentiate the B.1.1.7 variant from other variants that have the  $\Delta$ H69/ $\Delta$ V70 deletion. We validated this test on clinical samples that were sequenced to determine the exact SARS-CoV-2 lineage and the results demonstrated a high level of sensitivity in distinguishing the B.1.1.7 variant. This RT-qPCR test provides a positive identification of the B.1.1.7 variant, providing countries with a powerful tool to detect and track lineage B.1.1.7, especially countries that have considerable prevalence of variants carrying only the  $\Delta$ H69/ $\Delta$ V70 deletion<sup>25–28</sup>, which are mistakenly identified as B.1.1.7 variants by currently used SGTF assays.

Although there are hundreds of approved RT-qPCR tests for the detection of SARS-CoV-2, none of them are capable of directly differentiating the B.1.1.7 variant from common

variants of SARS-CoV-2. Paradoxically, failed RT-qPCR tests have been instrumental in identifying putative B.1.1.7 positive samples and tracking its prevalence<sup>25,29</sup>. These RT-qPCR tests contain multigene assays, with at least one assay targeting the spike gene, and during routine testing a “drop-out” in the spike gene assay may occur, while other gene targets yield positive signals. This SGTF can indicate the presence of the B.1.1.7 variant and flag samples for confirmation by sequencing. It is important to note, however, SGTFs are produced by other variants that contain the  $\Delta$ H69/ $\Delta$ V70 deletion, including the B.1.1, B1.258, and the mink cluster V (B.1.1.298) lineages<sup>8</sup>. This highlights the importance of follow up sequencing of SGTF samples to determine lineage status. Indeed, an analysis of SGTFs and corresponding sequencing data by Public Health England revealed that SGTF assays were poor proxies for the presence of B.1.1.7 in early October with only 3% of SGTFs assays positively identifying a B.1.1.7 variant.

The SGTF assays only became useful proxies when the variant spread and became more dominant in late November when the assays then detected over 90% of the variant<sup>30</sup>. Volz and colleagues<sup>6</sup> reached a similar conclusion, suggesting that the success of SGTF assays depends on the location, time, and frequency of other variants that contain the  $\Delta$ H69/ $\Delta$ V70 deletion. This is particularly problematic, since the SGTF assays are the least accurate at the time when the B.1.1.7 variant is at low prevalence, precisely the time when an accurate test is needed most in order to establish effective mitigation strategies. Our test outlined here makes significant strides in this effort by accurately differentiating the B.1.1.7 variant with a test that does not rely on a SGTF, thus providing a rapid, accurate test that eliminates the need to conduct expensive and laborious sequencing to confirm lineage status.

Besides the SGTF tests, two recent preprint papers from the same group describe a deep learning approach that was used to design two primer/probe sets targeting a synonymous mutation C16176T in the ORF1a gene or a nonsynonymous mutation in the spike gene (S982A) that were found to be specific to the B.1.1.7 variant<sup>31,32</sup>. However, the primer design raises questions because both mutations in the ORF1a and S genes appear in the middle of the respective forward primers, making it unlikely that either primer set would specifically amplify only the B.1.1.7 variant, since discrimination of SNPs generally requires the mutated base to be located near the 3'-terminal to inhibit extension by the polymerase. Also, the primer sets were only validated *in silico* so it is critical to assess their performance and specificity on clinical samples that have been verified by sequencing. Our approach targeted both the  $\Delta$ H69/ $\Delta$ V70 and  $\Delta$ Y144 deletions in the spike gene with the 3'-end of both forward and reverse primers spanning the region of the deletions. We also leveraged allele-specific PCR approaches where we introduced a mismatch base that resulted in enhanced differentiation of the B.1.1.7 variant from other  $\Delta$ H69/ $\Delta$ V70 variants, effectively allowing one

to discriminate between B.1.1.7, other  $\Delta$ H69/ $\Delta$ V70 variants, and the common SARS-CoV-2 in one test. As a testament to the specificity of this assay, our analysis of all GISAID sequences containing both the  $\Delta$ H69/ $\Delta$ V70 and  $\Delta$ Y144 deletions revealed that a staggering 99.98% of all these sequences belong to lineage B.1.1.7, ensuring that users can have high confidence that a positive B.1.1.7 assay result is a true positive.

The Grubaugh lab developed another test using primers that flanked both the  $\Delta$ H69/ $\Delta$ V70 and  $\Delta$ Y144 deletions and two different probes to mimic the S gene “drop-out” assay and permit a B.1.1.7 “detection” assay <sup>33</sup>. While the S gene “drop-out” assay successfully detected B.1.1.7 and other  $\Delta$ H69/ $\Delta$ V70 variants, the “detection” assay failed to distinguish between B.1.1.7,  $\Delta$ H69/ $\Delta$ V70 variants, and common SARS-CoV-2 variants. In essence, they created an open-source version of the SGTF RT-qPCR test that could be used for screening purposes. In an updated protocol <sup>34</sup>, they also multiplex their S gene drop-out assay with another drop out primer/probe set that targets the  $\Delta$ 3675-3677 SGF deletion in the ORF1a gene observed in B.1.1.7 and both the B.1.351 and P.1 variants recently detected in South Africa and Brazil. By combining these primer/probe sets with the CDC N1 primer/probe set, the user can putatively differentiate B.1.1.7 from B.1.351 and P.1 as well as variants containing only the  $\Delta$ H69/ $\Delta$ V70 deletion, providing a unique assay to screen for these emerging variants. While the B.1.351 and P.1 assay remains to be validated on clinical samples, the test still relies on target gene failures and therefore retains the limitations for SGTF assays and necessity to confirm lineage status by sequencing.

To differentiate B.1.1.7, we took an alternative approach by targeting the  $\Delta$ Y144 deletion using allele-specific PCR methods combined with judicious placement of LNA oligonucleotides. This allowed us to stabilize the 5'-end and mismatched base, and to shorten the 3'-terminal of the reverse primer. Together, these modifications provided us with a primer/probe set that retained specificity for B.1.1.7 variants and reduced specificity to other variants containing the  $\Delta$ H69/ $\Delta$ V70 deletion. Our test, instead of relying on target failures to identify putative variants, provides a positive signal in the presence of B.1.1.7 and  $\Delta$ H69/ $\Delta$ V70 deletion variants that can easily be differentiated by comparing their relative Ct values to a common SARS-CoV-2 S gene primer/probe set that serves as a benchmark.

We have provided interested users with the primer and probe sequences to implement this B.1.1.7 assay in their own laboratories with the hope this can rapidly scale the ability of countries to identify the B.1.1.7 variant and implement epidemiological measures to mitigate its spread. This test is also available as a research use only kit called rTest COVID-19 B.1.1.7 qPCR kit (<https://www.multiplexdx.com/products/rtest-covid-19-b-1-1-7-qpcr-kit>, MultiplexDX, Inc., Bratislava, Slovakia) that contains lyophilized SARS-CoV-2 S gene and B.1.1.7 primer/probe sets both multiplexed with human RNase P (200 reactions per assay) and a

lyophilized positive control containing B.1.1.7 RNA spiked with human RNA that can be used to validate all primer/probe sets. The kit utilizes the room temperature-stable SOLIScript® 1-step CoV Kit (SolisBiodyne) and laboratory tests show that all kit components are stable for at least one month at room temperature, eliminating cold chain shipping/storage and freeing valuable freezer storage space (e.g., for storage of mRNA-based vaccines). This test can provide labs with a powerful tool to directly confirm the presence of the B.1.1.7 variant in a sample previously determined SARS-CoV-2 positive by an approved screening test, thus avoiding the use of target gene failure assays that can be plagued with low specificity and obviating the need to conduct burdensome and costly genomic sequencing. This is particularly important for countries that are experiencing extensive circulation of variants harboring only the  $\Delta H69/\Delta V70$  deletion as current RT-qPCR assays that rely on SGTFs erroneously classify these samples as presumptive B.1.1.7 variants.

## **Acknowledgements**

We gratefully acknowledge the authors from the submitting and originating laboratories that shared genetic sequencing data with the GISAID initiative. This project was supported by the European Union's Horizon 2020 research and innovation program [EVA-GLOBAL project, grant agreement number 871029] (BK) and grants from the Slovak Research and Development Agency: PP-COVID-20-0017 (BK) and PP-COVID-20-0116 (PC, BK).



## References

1. Rambaut, A. *et al.* Preliminary genomic characterisation of an emergent SARS-CoV-2 lineage in the UK defined by a novel set of spike mutations. *Virological* <https://virological.org/t/preliminary-genomic-characterisation-of-an-emergent-sars-cov-2-lineage-in-the-uk-defined-by-a-novel-set-of-spike-mutations/563> (2020).
2. GISAID, EpiCoV Data Curation Team. GISAID - UK reports new variant, termed VUI 202012/01. <https://www.gisaid.org/references/gisaid-in-the-news/uk-reports-new-variant-termed-vui-20201201/>.
3. Luan, B., Wang, H. & Huynh, T. Molecular Mechanism of the N501Y Mutation for Enhanced Binding between SARS-CoV-2's Spike Protein and Human ACE2 Receptor. *bioRxiv* 2021.01.04.425316 (2021) doi:10.1101/2021.01.04.425316.
4. Starr, T. N. *et al.* Deep Mutational Scanning of SARS-CoV-2 Receptor Binding Domain Reveals Constraints on Folding and ACE2 Binding. *Cell* **182**, 1295-1310.e20 (2020).
5. Grabowski, F., Preibisch, G., Kochańczyk, M. & Lipniacki, T. SARS-CoV-2 Variant Under Investigation 202012/01 has more than twofold replicative advantage. *medRxiv* 2020.12.28.20248906 (2021) doi:10.1101/2020.12.28.20248906.
6. Volz, E. *et al.* Transmission of SARS-CoV-2 Lineage B.1.1.7 in England: Insights from linking epidemiological and genetic data. *medRxiv* 2020.12.30.20249034 (2021) doi:10.1101/2020.12.30.20249034.
7. Davies, N. G. *et al.* Estimated transmissibility and severity of novel SARS-CoV-2 Variant of Concern 202012/01 in England. *medRxiv* 2020.12.24.20248822 (2020) doi:10.1101/2020.12.24.20248822.
8. Kemp, S. A. *et al.* Recurrent emergence and transmission of a SARS-CoV-2 Spike deletion H69/V70. *bioRxiv* 2020.12.14.422555 (2021) doi:10.1101/2020.12.14.422555.
9. Kidd, M. *et al.* S-variant SARS-CoV-2 is associated with significantly higher viral loads in samples tested by ThermoFisher TaqPath RT-QPCR. *medRxiv* 2020.12.24.20248834 (2020) doi:10.1101/2020.12.24.20248834.
10. Golubchik, T. *et al.* Early analysis of a potential link between viral load and the N501Y mutation in the SARS-COV-2 spike protein. *medRxiv* 2021.01.12.20249080 (2021) doi:10.1101/2021.01.12.20249080.
11. Horby, P. *et al.* NERVTAG paper on COVID-19 variant of concern B.1.1.7. in (2021).
12. Nakamura, T., Yamada, K. D., Tomii, K. & Katoh, K. Parallelization of MAFFT for large-scale multiple sequence alignments. *Bioinformatics* **34**, 2490–2492 (2018).
13. Gouy, M., Guindon, S. & Gascuel, O. SeaView version 4: A multiplatform graphical user interface for sequence alignment and phylogenetic tree building. *Mol Biol Evol* **27**, 221–224 (2010).
14. McTigue, P. M., Peterson, R. J. & Kahn, J. D. Sequence-Dependent Thermodynamic Parameters for Locked Nucleic Acid (LNA)–DNA Duplex Formation. *Biochemistry* **43**, 5388–5405 (2004).

15. Latorra, D., Arar, K. & Michael Hurley, J. Design considerations and effects of LNA in PCR primers. *Molecular and Cellular Probes* **17**, 253–259 (2003).
16. Levin, J. D., Fiala, D., Samala, M. F., Kahn, J. D. & Peterson, R. J. Position-dependent effects of locked nucleic acid (LNA) on DNA sequencing and PCR primers. *Nucleic Acids Res* **34**, e142–e142 (2006).
17. Zuker, M. Mfold web server for nucleic acid folding and hybridization prediction. *Nucleic Acids Res* **31**, 3406–3415 (2003).
18. Resende, P. C. *et al.* SARS-CoV-2 genomes recovered by long amplicon tiling multiplex approach using nanopore sequencing and applicable to other sequencing platforms. *bioRxiv* 2020.04.30.069039 (2020) doi:10.1101/2020.04.30.069039.
19. Yip, S. P. *et al.* Use of Dual TaqMan Probes to Increase the Sensitivity of 1-Step Quantitative Reverse Transcription-PCR: Application to the Detection of SARS Coronavirus. *Clin Chem* **51**, 1885–1888 (2005).
20. Nagy, A. *et al.* Evaluation of TaqMan qPCR System Integrating Two Identically Labelled Hydrolysis Probes in Single Assay. *Scientific Reports* **7**, 41392 (2017).
21. Gibbs, R. A., Nguyen, P. N. & Caskey, C. T. Detection of single DNA base differences by competitive oligonucleotide priming. *Nucleic Acids Res* **17**, 2437–2448 (1989).
22. Tsai, M. Y., Hanson, N. Q., Copeland, K. R., Beheshti, I. & Garg, U. Determination of a T/G polymorphism at nucleotide 3206 of the apolipoprotein C III gene by amplification refractory mutation system. *Clin Chem* **40**, 2235–2239 (1994).
23. Lefever, S., Pattyn, F., Hellemans, J. & Vandesompele, J. Single-nucleotide polymorphisms and other mismatches reduce performance of quantitative PCR assays. *Clin Chem* **59**, 1470–1480 (2013).
24. Centers for Disease Control and Prevention. Research Use Only 2019-Novel Coronavirus (2019-nCoV) Real-time RT-PCR Primers and Probes. <https://www.cdc.gov/coronavirus/2019-ncov/lab/rt-pcr-panel-primer-probes.html> (2020).
25. Bal, A. *et al.* Two-step strategy for the identification of SARS-CoV-2 variant of concern 202012/01 and other variants with spike deletion H69-V70, France, August to December 2020. *medRxiv* 2020.11.10.20228528 (2021) doi:10.1101/2020.11.10.20228528.
26. Brejová, B., Klempa, B. & *et al.* B.1.258 $\Delta$ , a SARS-CoV-2 variant with  $\Delta$ H69/ $\Delta$ V70 in the Spike protein circulating in the Czech Republic and Slovakia. *Virological* <https://virological.org/t/b-1-258-a-sars-cov-2-variant-with-h69-v70-in-the-spike-protein-circulating-in-the-czech-republic-and-slovakia/613> (2021).
27. Moreno, G. *et al.* Detection of non-B.1.1.7 Spike  $\Delta$ 69/70 sequences (B.1.375) in the United States - SARS-CoV-2 coronavirus / nCoV-2019 Genomic Epidemiology. *Virological* <https://virological.org/t/detection-of-non-b-1-1-7-spike-69-70-sequences-b-1-375-in-the-united-states/587> (2021).
28. Larsen, B. B. & Worobey, M. Identification of a novel SARS-CoV-2 Spike 69-70 deletion lineage circulating in the United States - SARS-CoV-2 coronavirus / SARS-CoV-2 Molecular Evolution. *Virological* <https://virological.org/t/identification-of-a-novel-sars-cov-2-spike-69-70-deletion-lineage-circulating-in-the-united-states/577> (2020).

29. Washington, N. L. *et al.* S gene dropout patterns in SARS-CoV-2 tests suggest spread of the H69del/V70del mutation in the US. *medRxiv* 2020.12.24.20248814 (2020)  
doi:10.1101/2020.12.24.20248814.
30. Variant technical group. Investigation of novel SARS-CoV-2 variant: Variant of Concern 202012/01. Technical briefing 4. *Public Health England* 16 (2021).
31. Lopez-Rincon, A. *et al.* Design of Specific Primer Set for Detection of B.1.1.7 SARS-CoV-2 Variant using Deep Learning. *bioRxiv* 2020.12.29.424715 (2020)  
doi:10.1101/2020.12.29.424715.
32. Lopez-Rincon, A. *et al.* Design of Specific Primer Sets for the Detection of B.1.1.7, B.1.351 and P.1 SARS-CoV-2 Variants using Deep Learning. *bioRxiv* 2021.01.20.427043 (2021) doi:10.1101/2021.01.20.427043.
33. Vogels, C. B. F., Alpert, T., Breban, M., Fauver, J. R. & Grubaugh, N. D. Multiplexed RT-qPCR to screen for SARS-COV-2 B.1.1.7 variants: Preliminary results - SARS-CoV-2 coronavirus / nCoV-2019 Diagnostics and Vaccines. *Virological*  
<https://virological.org/t/multiplexed-rt-qpcr-to-screen-for-sars-cov-2-b-1-1-7-variants-preliminary-results/588> (2021).
34. Vogels, C. Multiplexed RT-qPCR to screen for SARS-COV-2 B.1.1.7, B.1.351, and P.1 variants of concern. (2021) doi:10.17504/protocols.io.brrhm536.

**Table 1. Origin and genomic characterization of GISAID sequences used for alignment and primer/probe design.**

| Country of origin | Sequences | Omitted | No deletions | $\Delta$ H69/ $\Delta$ V70 only | $\Delta$ Y144 only | $\Delta$ H69/ $\Delta$ V70 and $\Delta$ Y144 |
|-------------------|-----------|---------|--------------|---------------------------------|--------------------|----------------------------------------------|
| Australia         | 21        | 0       | 20 (95.2 %)  | 0                               | 0                  | 1 (4.8 %)                                    |
| Denmark           | 107       | 0       | 99 (92.5 %)  | 8 (7.5 %)                       | 0                  | 0                                            |
| UK                | 965       | 5       | 725 (75.5 %) | 8 (0.8 %)                       | 0                  | 227 (23.7 %)                                 |
| New Zealand       | 13        | 0       | 13           | 0                               | 0                  | 0                                            |
| Sweden            | 2         | 0       | 2            | 0                               | 0                  | 0                                            |
| Thailand          | 3         | 0       | 3            | 0                               | 0                  | 0                                            |
| USA               | 25        | 0       | 25           | 0                               | 0                  | 0                                            |
| <b>Total</b>      | 1136      | 5       | 887          | 16                              | 0                  | 228                                          |

**Table 2. Oligonucleotide primers and probes for common SARS-CoV-2 S gene primer/probe set.**

| Oligonucleotide                       | Sequence                                                     | T <sub>m</sub> (°C) | Secondary structure potential (kcal/mol) |
|---------------------------------------|--------------------------------------------------------------|---------------------|------------------------------------------|
| SARS-CoV-2 S gene - <b>F1</b>         | TCT <b>t</b> TtCCAATGTTACTTGGTTC                             | 54.3                | -1.52                                    |
| SARS-CoV-2 S gene - <b>F2</b>         | TCT <b>t</b> TtCCAATGTTACTTGGT <b>t</b> C                    | 55.9                | -1.52                                    |
| SARS-CoV-2 S gene - <b>F3</b>         | T <b>t</b> ACCT <b>t</b> TCT <b>t</b> TTCCAATGTTAC C         | 54.5                | 1.51                                     |
| SARS-CoV-2 S gene - <b>F4</b>         | CT <b>t</b> ACCT <b>t</b> TCT <b>t</b> TTCCAATGT <b>t</b> AC | 56.4                | 1.51                                     |
| SARS-CoV-2 S gene - <b>P1</b>         | AGAGGTTTGATAACCCTGTCTACCA                                    | 59.1                | -1.97                                    |
| SARS-CoV-2 S gene - <b>P2</b>         | AGAGGTTTGATAACCCTGTCC <b>t</b> ACCA                          | 60.3                | -1.97                                    |
| SARS-CoV-2 S gene/B.1.1.7 - <b>P3</b> | AGAGGTTTGATAACCCTG <b>t</b> CC <b>t</b> ACCA                 | 61.9                | -1.97                                    |
| SARS-CoV-2 S gene/B.1.1.7- <b>P4</b>  | T <b>t</b> TGCTTCCACTGAGAAGT <b>Ct</b> AA <b>Ct</b> AT       | 59.0                | -1.48                                    |
| SARS-CoV-2 S gene - <b>R1</b>         | AGTAGGGACTGGGTCTTCGAATCT                                     | 58.9                | -0.94                                    |
| SARS-CoV-2 S gene - <b>R2</b>         | GTAGGGACTGGGTCTTCGAATCTA                                     | 57.3                | -0.94                                    |

Primers/probes highlighted in green comprise the final common SARS-CoV-2 S gene primer/probe set

Nucleotides in lowercase and bold denote LNA-modified bases

F, forward primer; P, probe; R, reverse primer

**Table 3. Oligonucleotide primers and probes for lineage B.1.1.7 S gene primer/probe set.**

| Oligonucleotide                                                        | Sequence                     | T <sub>m</sub> (°C) | Secondary structure potential (kcal/mol) |
|------------------------------------------------------------------------|------------------------------|---------------------|------------------------------------------|
| <i>Forward primers (F1-F4) targeting the 1st deletion (ΔH69/ΔV70)</i>  |                              |                     |                                          |
| B.1.1.7 - F1                                                           | GTTACTTGGTTCCATGCTATCTCTG    | 55.3                | 1.11                                     |
| B.1.1.7 - F2                                                           | GTtACTTGGTTCCATGCTATCTCT     | 56.3                | 1.11                                     |
| B.1.1.7 - F3                                                           | GTtACTtGGTTCCATGCTATCTC      | 56.8                | 1.11                                     |
| B.1.1.7 - F4                                                           | GTTCCATGCTATCTCTGGGACC       | 57.1                | -0.62                                    |
| <i>Detection probes (P1-P4) targeting the 1st deletion (ΔH69/ΔV70)</i> |                              |                     |                                          |
| B.1.1.7 - P1                                                           | ATGCTATCTCTGGGACCAATGGTACT   | 59.1                | -0.96                                    |
| B.1.1.7 - P2                                                           | ATGCTATCTCTGGGACCAATGGtACT   | 60.9                | -0.96                                    |
| B.1.1.7 - P3                                                           | TGCTATCTCTGGGACCAATGGTACT    | 59.1                | -0.96                                    |
| B.1.1.7 - P4                                                           | TGCTATCTCTGGGACCAATGGtACT    | 61.0                | -0.96                                    |
| <i>Detection probes (P3-P4) targeting all SARS-CoV-2 variants</i>      |                              |                     |                                          |
| SARS-CoV-2 S gene/B.1.1.7 - P3                                         | AGAGGTTTGATAACCCTGtCctACCA   | 61.9                | -1.97                                    |
| SARS-CoV-2 S gene/B.1.1.7- P4                                          | TtTGCTTCCACTGAGAAGTctAACAT   | 59.0                | -1.48                                    |
| <i>Reverse primers (R1-R37) targeting the 2nd deletion (ΔY144)</i>     |                              |                     |                                          |
| B.1.1.7 - R1                                                           | TtTGTTGTTTTTGTGGTAAaCACC     | 55.2                | -1.51                                    |
| B.1.1.7 - R2                                                           | TtGTTGTTtTTGTGGTAAaCACC      | 56.9                | -1.51                                    |
| B.1.1.7 - R3                                                           | TGTTGTTtTTGTGGTAAaCACCC      | 57.1                | -1.51                                    |
| B.1.1.7 - R4                                                           | GTTGTTtTTGTGGTAAaCACCC       | 55.6                | -1.51                                    |
| B.1.1.7 - R5                                                           | TtGTtGTTtTTGTGGTAAaCAC       | 56.6                | -1.51                                    |
| B.1.1.7 - R6                                                           | TGtTGtTTTTGTGGTAAaCAC        | 56.1                | -1.51                                    |
| B.1.1.7 - R7                                                           | CAACTtTTGTTGTTTTTGTGGTAAACAC | 55.6                | -3.34                                    |
| B.1.1.7 - R8                                                           | CAACTtTtGTTGTTTTTGTGGTAAACAC | 56.7                | -3.34                                    |
| B.1.1.7 - R9                                                           | CAaCtTTTGTGTTTTTGTGGTAAACAC  | 56.6                | -3.34                                    |
| B.1.1.7 - R10                                                          | CAACTtTtGTTGTTTTTGTGGTAAACA  | 56.0                | -2.38                                    |
| B.1.1.7 - R11                                                          | CAaCtTtTGTTGTTTTTGTGGTAAACA  | 57.0                | -2.38                                    |
| B.1.1.7 - R12                                                          | CAaCtTtTGTTGTTTTTGTGGTAAAC   | 55.8                | -2.14                                    |
| B.1.1.7 - R13                                                          | CAACTtTtGTTGTTTTTGTGGTAAAC   | 54.7                | -2.14                                    |
| B.1.1.7 - R14                                                          | CAACTTTtGTTGTTTTTGTGGTAAAC   | 55.0                | -2.14                                    |
| B.1.1.7 - R15                                                          | CAACTtTtGTTGTTTTTGTGGTAAAC   | 55.3                | -2.14                                    |
| B.1.1.7 - R16                                                          | CAACTTTtGTTGTTTTTGTGGTAAAC   | 54.1                | -2.14                                    |
| B.1.1.7 - R17                                                          | CAACTtTTGTTGTTTTTGTGGTAAAC   | 53.8                | -2.14                                    |
| B.1.1.7 - R18                                                          | CAACTTTTGTGTTTTTGTGGTAAAC    | 53.6                | -2.14                                    |
| B.1.1.7 - R19                                                          | CAACTTTtGTTGtTTTTGTGGTAAAC   | 55.4                | -2.14                                    |

|               |                                                      |      |       |
|---------------|------------------------------------------------------|------|-------|
| B.1.1.7 - R20 | CAACT <b>t</b> TTGTTG <b>t</b> TTTTGTGGTAAAC         | 55.1 | -2.14 |
| B.1.1.7 - R21 | CAACT <b>t</b> TtGTTGTTTTGTGGTAAA                    | 54.4 | -2.14 |
| B.1.1.7 - R22 | CAACTTT <b>t</b> GTTG <b>t</b> TTTTGTGGTAAA          | 54.5 | -2.14 |
| B.1.1.7 - R23 | CAACTTT <b>t</b> GTTG <b>t</b> TTTTGTGGTAAAC         | 56.3 | -2.14 |
| B.1.1.7 - R24 | CAACT <b>t</b> TtGTTG <b>t</b> TTTTGTGGTAAAC         | 56.6 | -2.14 |
| B.1.1.7 - R25 | CAACTTT <b>t</b> GTTGTTTTGTGGTAAACA                  | 56.2 | -2.38 |
| B.1.1.7 - R26 | CAACT <b>t</b> TtGTTGTTTTGTGGTAAACA                  | 56.5 | -2.38 |
| B.1.1.7 - R27 | CAACTTT <b>t</b> GTTG <b>t</b> TTTTGTGGTAAACA        | 56.6 | -2.38 |
| B.1.1.7 - R28 | CAACTTT <b>t</b> GTTGTTTTGTGGTAA <b>CC</b>           | 56.5 | -2.26 |
| B.1.1.7 - R29 | CAACTTT <b>t</b> GTTGTTTTGTGGTAA <b>GC</b>           | 56.7 | -2.26 |
| B.1.1.7 - R30 | CAACT <b>t</b> TtGTTGTTTTGTGGTAA <b>CC</b>           | 56.9 | -2.26 |
| B.1.1.7 - R31 | CAACT <b>t</b> TtGTTGTTTTGTGGTAA <b>GC</b>           | 57.1 | -2.26 |
| B.1.1.7 - R32 | CAACT <b>t</b> TtGTTGTTTTGTGGTAA <b>CAC</b>          | 56.8 | -2.26 |
| B.1.1.7 - R33 | CAACTTT <b>t</b> GTTG <b>t</b> TTTTGTGGTAA <b>GC</b> | 58.0 | -2.26 |
| B.1.1.7 - R34 | CAACTTT <b>t</b> GTTGTT <b>t</b> TTGTGGTAA <b>GC</b> | 58.0 | -2.26 |
| B.1.1.7 - R35 | CAACTTT <b>t</b> GTTGTTTTGTGGTAA <b>GC</b>           | 58.2 | -2.26 |
| B.1.1.7 - R36 | CAACTTT <b>t</b> GTTGTTTTGTGGTAA <b>GC</b>           | 58.2 | -2.26 |
| B.1.1.7 - R37 | CAACTTT <b>t</b> GTTGTTTTGTGGTAA <b>GC</b>           | 58.4 | -2.26 |

Primers/probes highlighted in green comprise the final lineage B.1.1.7 S gene primer/probe set

Nucleotides in lowercase and bold denote LNA-modified bases

Nucleotides in red font indicate mismatch bases used for SNP detection

F, forward primer; P, probe; R, reverse primer



**Table 4. Interpretation of SARS-CoV-2 test results and corresponding actions**

| SARS-CoV-2 S gene | $\Delta$ Ct between SARS-CoV-2 S gene and B.1.1.7 | Human RNase P | Result interpretation                                   | Report                      |
|-------------------|---------------------------------------------------|---------------|---------------------------------------------------------|-----------------------------|
| +                 | Max 5 Ct                                          | +/ND          | SARS-CoV-2 B.1.1.7 detected                             | SARS-CoV-2 B.1.1.7 positive |
| +                 | Min 8 Ct                                          | +/ND          | SARS-CoV-2 $\Delta$ H69/ $\Delta$ V70 deletion detected | SARS-CoV-2 B.1.1.7 negative |
| +                 | Min 20 Ct                                         | +/ND          | Other lineage of SARS-CoV-2 detected                    | SARS-CoV-2 B.1.1.7 negative |
| +                 | ND                                                | +/ND          | Consensus or other lineage of SARS-CoV-2 detected       | SARS-CoV-2 B.1.1.7 negative |
| ND                | +                                                 | +/ND          | Inconclusive result                                     | Inconclusive                |
| ND                | ND                                                | ND            | Invalid result                                          | Invalid                     |

ND, not detected

**Table 5. Clinical performance of SARS-CoV-2 S gene and B.1.1.7 primer/probes sets.**

| Analyzed samples                                      | Sequencing | rTEST COVID-19 B.1.1.7 qPCR |                                                       |                                 |                             |              |
|-------------------------------------------------------|------------|-----------------------------|-------------------------------------------------------|---------------------------------|-----------------------------|--------------|
|                                                       |            | SARS-CoV-2 S gene           | B.1.1.7 ( $\Delta$ H69/ $\Delta$ V70 + $\Delta$ Y144) | $\Delta$ H69/ $\Delta$ V70 only | Other lineage of SARS-CoV-2 | Inconclusive |
| B.1.1.7 ( $\Delta$ H69/ $\Delta$ V70 + $\Delta$ Y144) | 37         | 37                          | 36                                                    | 0                               | 0                           | 1            |
| $\Delta$ H69/ $\Delta$ V70 only                       | 16         | 16                          | 0                                                     | 13                              | 2                           | 1            |
| Other lineages of SARS-CoV-2                          | 12         | 12                          | 0                                                     | 0                               | 12                          | 0            |

**Table 6. Overview of clinical sample RT-qPCR results, lineage, and GISAID information**

| Sample ID | rTEST COVID-19 qPCR B.1.1.7 kit |                 |             | Sequencing                          |                |                        |
|-----------|---------------------------------|-----------------|-------------|-------------------------------------|----------------|------------------------|
|           | B.1.1.7 PCR [Ct]                | S gene PCR [Ct] | $\Delta$ Ct | Sequencing outcome (GISAID lineage) | Name in GISAID | Accession ID in GISAID |
| 1         | 23.8                            | 23.6            | 0.2         | <b>B.1.1.7</b>                      | UKBA-706       | EPI_ISL_875525         |
| 2         | 18.0                            | 18.1            | -0.1        | <b>B.1.1.7</b>                      | UKBA-707       | EPI_ISL_875526         |
| 3         | 33.9                            | 34.5            | -0.5        | <b>B.1.1.7</b>                      | UKBA-801       | EPI_ISL_831667         |
| 4         | 36.4                            | 36.0            | 0.5         | <b>B.1.1.7</b>                      | UKBA-802       | EPI_ISL_831668         |
| 5         | 32.3                            | 31.5            | 0.8         | <b>B.1.1.7</b>                      | UKBA-708       | EPI_ISL_875527         |
| 6         | 37.5                            | 35.2            | 2.3         | <b>B.1.1.7</b>                      | UKBA-803       | EPI_ISL_831672         |
| 7         | 23.7                            | 25.0            | -1.3        | <b>B.1.1.7</b>                      | UKBA-714       | EPI_ISL_875521         |
| 8         | 25.3                            | 24.8            | 0.5         | <b>B.1.1.7</b>                      | UKBA-713       | EPI_ISL_875520         |
| 9         | No CT                           | 30.6            | -           | <b>B.1.160</b>                      | UKBA-701       | EPI_ISL_875530         |
| 10        | 28.8                            | 28.5            | 0.3         | <b>B.1.1.7</b>                      | UKBA-703       | EPI_ISL_875522         |
| 11        | 32.0                            | 26.9            | 5.0         | <b>B.1.1.7</b>                      | UKBA-705       | EPI_ISL_875524         |
| 12        | 25.2                            | 22.9            | 2.3         | <b>B.1.1.7</b>                      | UKBA-704       | EPI_ISL_875523         |
| 13        | 32.2                            | 24.5            | 7.7         | <b>B.1.258</b>                      | UKBA-702       | EPI_ISL_875528         |
| 14        | No CT                           | 28.8            | -           | <b>B.1.1.243</b>                    | UKBA-715       | EPI_ISL_875516         |
| 15        | No CT                           | 29.6            | -           | <b>B.1.177</b>                      | UKBA-716       | EPI_ISL_875533         |
| 16        | No CT                           | 24.4            | -           | <b>B.1.177</b>                      | UKBA-717       | EPI_ISL_875534         |
| 17        | 34.3                            | 29.6            | 4.7         | <b>B.1.1.7</b>                      | UKBA-718       | EPI_ISL_875517         |
| 18        | 30.8                            | 30.2            | 0.6         | <b>B.1.1.7</b>                      | UKBA-719       | EPI_ISL_875518         |
| 19        | 25.2                            | 22.6            | 2.6         | <b>B.1.1.7</b>                      | UKBA-720       | EPI_ISL_875519         |
| 20        | 23.2                            | 13.2            | 10.1        | <b>B.1.258</b>                      | UKBA-722       | EPI_ISL_875529         |
| 21        | No CT                           | 12.7            | -           | <b>B.1.1.170</b>                    | UKBA-723       | EPI_ISL_875532         |
| 22        | No CT                           | 25.8            | -           | <b>B.1.1.170</b>                    | UKBA-724       | EPI_ISL_875538         |

|    |       |      |      |                  |           |                |
|----|-------|------|------|------------------|-----------|----------------|
| 23 | 21.1  | 18.8 | 2.3  | <b>B.1.1.7</b>   | UKBA-804  | EPI_ISL_831669 |
| 24 | 29.5  | 26.9 | 2.6  | <b>B.1.1.7</b>   | UKBA-805  | EPI_ISL_831670 |
| 25 | 22.8  | 20.8 | 1.9  | <b>B.1.1.7</b>   | UKBA-806  | EPI_ISL_831673 |
| 26 | 26.2  | 24.2 | 2.0  | <b>B.1.1.7</b>   | UKBA-807  | EPI_ISL_831671 |
| 27 | 21.3  | 18.6 | 2.6  | <b>B.1.1.7</b>   | UKBA-808  | EPI_ISL_831674 |
| 28 | 26.7  | 15.2 | 11.5 | <b>B.1.258</b>   | UKBA-809  | EPI_ISL_831676 |
| 29 | 30.0  | 27.8 | 2.3  | <b>B.1.1.7</b>   | UKBA-814  | EPI_ISL_831675 |
| 30 | 23.5  | 21.8 | 1.6  | <b>B.1.1.7</b>   | UKBA-815  | EPI_ISL_831663 |
| 31 | 22.9  | 18.7 | 4.1  | <b>B.1.1.7</b>   | UKBA-816  | EPI_ISL_831664 |
| 32 | 28.5  | 24.2 | 4.3  | <b>B.1.1.7</b>   | UKBA-817  | EPI_ISL_831665 |
| 33 | No CT | 30.1 | -    | <b>B.1.258</b>   | UKBA-818  | EPI_ISL_831666 |
| 34 | 25.4  | 24.0 | 1.4  | <b>B.1.1.7</b>   | UKBA-501  | EPI_ISL_779651 |
| 35 | 29.4  | 29.1 | 0.3  | <b>B.1.1.7</b>   | UKBA-502  | EPI_ISL_779652 |
| 36 | 30.7  | 28.9 | 1.8  | <b>B.1.1.7</b>   | UKBA-503  | EPI_ISL_779653 |
| 37 | 31.5  | 30.0 | 1.5  | <b>B.1.1.7</b>   | UKBA-504  | EPI_ISL_779654 |
| 38 | 34.3  | 29.9 | 4.4  | <b>B.1.1.7</b>   | UKBA-505  | EPI_ISL_779655 |
| 39 | 31.5  | 30.8 | 0.7  | <b>B.1.1.7</b>   | UKBA-506  | EPI_ISL_779656 |
| 40 | 37.9  | 32.2 | 5.7  | <b>B.1.1.7</b>   | UKBA-507  | EPI_ISL_779657 |
| 41 | 30.2  | 29.1 | 1.1  | <b>B.1.1.7</b>   | UKBA-508  | EPI_ISL_779658 |
| 42 | 37.6  | 34.4 | 3.2  | <b>B.1.1.7</b>   | UKBA-509  | EPI_ISL_779659 |
| 43 | 39.7  | 35.2 | 4.5  | <b>B.1.1.7</b>   | UKBA-512  | EPI_ISL_779660 |
| 44 | 25.8  | 14.7 | 11.1 | <b>B.1.258</b>   | UKBA-1001 | EPI_ISL_903980 |
| 45 | No CT | 23.1 | -    | <b>B.1.1.170</b> | UKBA-1002 | EPI_ISL_903981 |
| 46 | 24.4  | 15.2 | 9.2  | <b>B.1.258</b>   | UKBA-1004 | EPI_ISL_903983 |
| 47 | 35.8  | 27.1 | 8.7  | <b>B.1.258</b>   | UKBA-1005 | EPI_ISL_903984 |
| 48 | 29.1  | 18.3 | 10.8 | <b>B.1.258</b>   | UKBA-1006 | EPI_ISL_903985 |
| 49 | 15.6  | 16.8 | -1.2 | <b>B.1.1.7</b>   | UKBA-1007 | EPI_ISL_903986 |
| 50 | 25.4  | 16.1 | 9.3  | <b>B.1.258</b>   | UKBA-1008 | EPI_ISL_903987 |
| 51 | No CT | 16.5 | -    | <b>B.1.160</b>   | UKBA-1009 | EPI_ISL_903988 |
| 52 | 19.9  | 17.4 | 2.5  | <b>B.1.1.7</b>   | UKBA-1010 | EPI_ISL_903989 |
| 53 | 27.6  | 25.5 | 2.1  | <b>B.1.1.7</b>   | UKBA-1011 | EPI_ISL_903990 |
| 54 | 37.1  | 26.0 | 11.1 | <b>B.1.258</b>   | UKBA-1012 | EPI_ISL_903991 |
| 55 | No CT | 15.1 | -    | <b>B.1.177</b>   | UKBA-1013 | EPI_ISL_903992 |
| 56 | 28.0  | 19.6 | 8.4  | <b>B.1.258</b>   | UKBA-1014 | EPI_ISL_903993 |
| 57 | No CT | 23.4 | -    | <b>B.1.1.277</b> | UKBA-1015 | EPI_ISL_903994 |
| 58 | 35.5  | 26.9 | 8.6  | <b>B.1.258</b>   | UKBA-1016 | EPI_ISL_903995 |
| 59 | No CT | 16.3 | -    | <b>B.1.160</b>   | UKBA-1017 | EPI_ISL_903996 |
| 60 | 33.2  | 22.9 | 10.3 | <b>B.1.258</b>   | UKBA-1018 | EPI_ISL_903997 |
| 61 | 26.5  | 17.5 | 9.0  | <b>B.1.258</b>   | UKBA-1020 | EPI_ISL_903999 |
| 62 | 19.8  | 20.7 | -0.9 | <b>B.1.1.7</b>   | UKBA-1021 | EPI_ISL_904000 |
| 63 | No CT | 18.9 | -    | <b>B.1.221</b>   | UKBA-1022 | EPI_ISL_904001 |
| 64 | 35.2  | 25.3 | 9.9  | <b>B.1.258</b>   | UKBA-1023 | EPI_ISL_904002 |
| 65 | No CT | 28.9 | -    | <b>B.1.258</b>   | UKBA-1024 | EPI_ISL_904003 |

**Figure 1.**

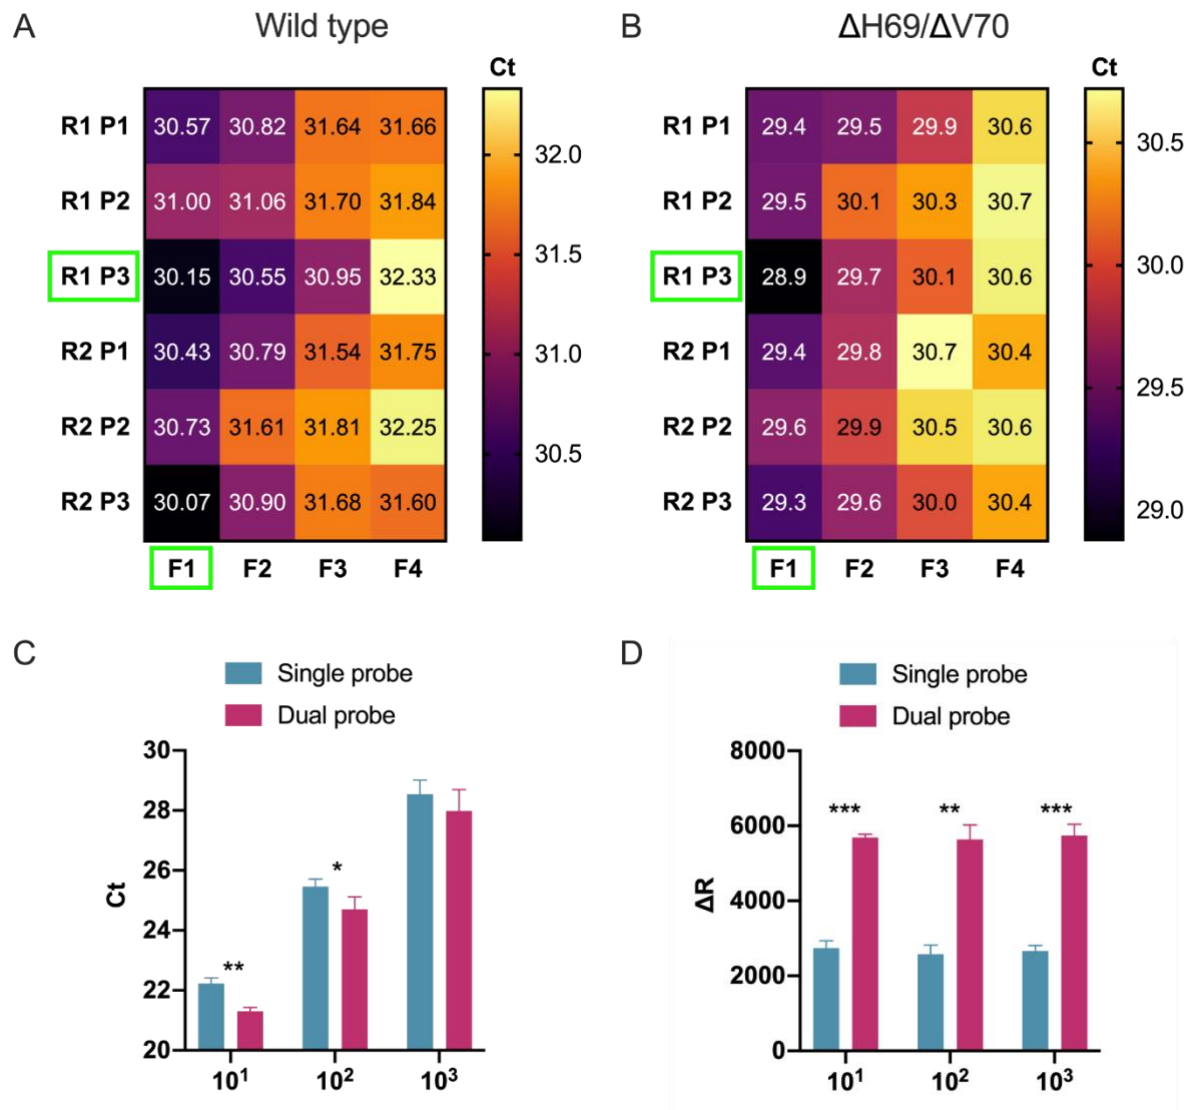

**Figure 1. Development and optimization of a general SARS-CoV-2 S gene primer/probe set for all SARS-CoV-2 variants.**

**A, B)** Heatmaps illustrate oligonucleotide primer and probe combinations designed to target conserved sequences within the spike gene, including all SARS-CoV-2 variants that were contained in our bioinformatics analysis. Combinations of forward (F1-F4) and reverse primers (R1-R2) and hydrolysis probes (P1-P2) were tested using two separate SARS-CoV-2 variants, a common SARS-CoV-2 variant (Wild type, panel **A**) and a variant containing the  $\Delta$ H69/ $\Delta$ V70 deletion (**B**). Green rectangle boxes indicate best performing primer/probe combinations. **C, D)** Bargraphs compare RT-qPCR performance of a single probe versus an additional identically labelled dual probe using three 10-fold ( $10^1$ ,  $10^2$ ,  $10^3$ ) dilutions of SARS-CoV-2 template ran in triplicates. Evaluation of the performance was done by comparing raw Ct values (**C**) and fluorescence intensity values (**D**). Statistical analysis was performed using paired t-test (\*\*\* $p \leq 0.001$ , \*\* $p \leq 0.01$ , \* $p \leq 0.05$ ).

Figure 2.

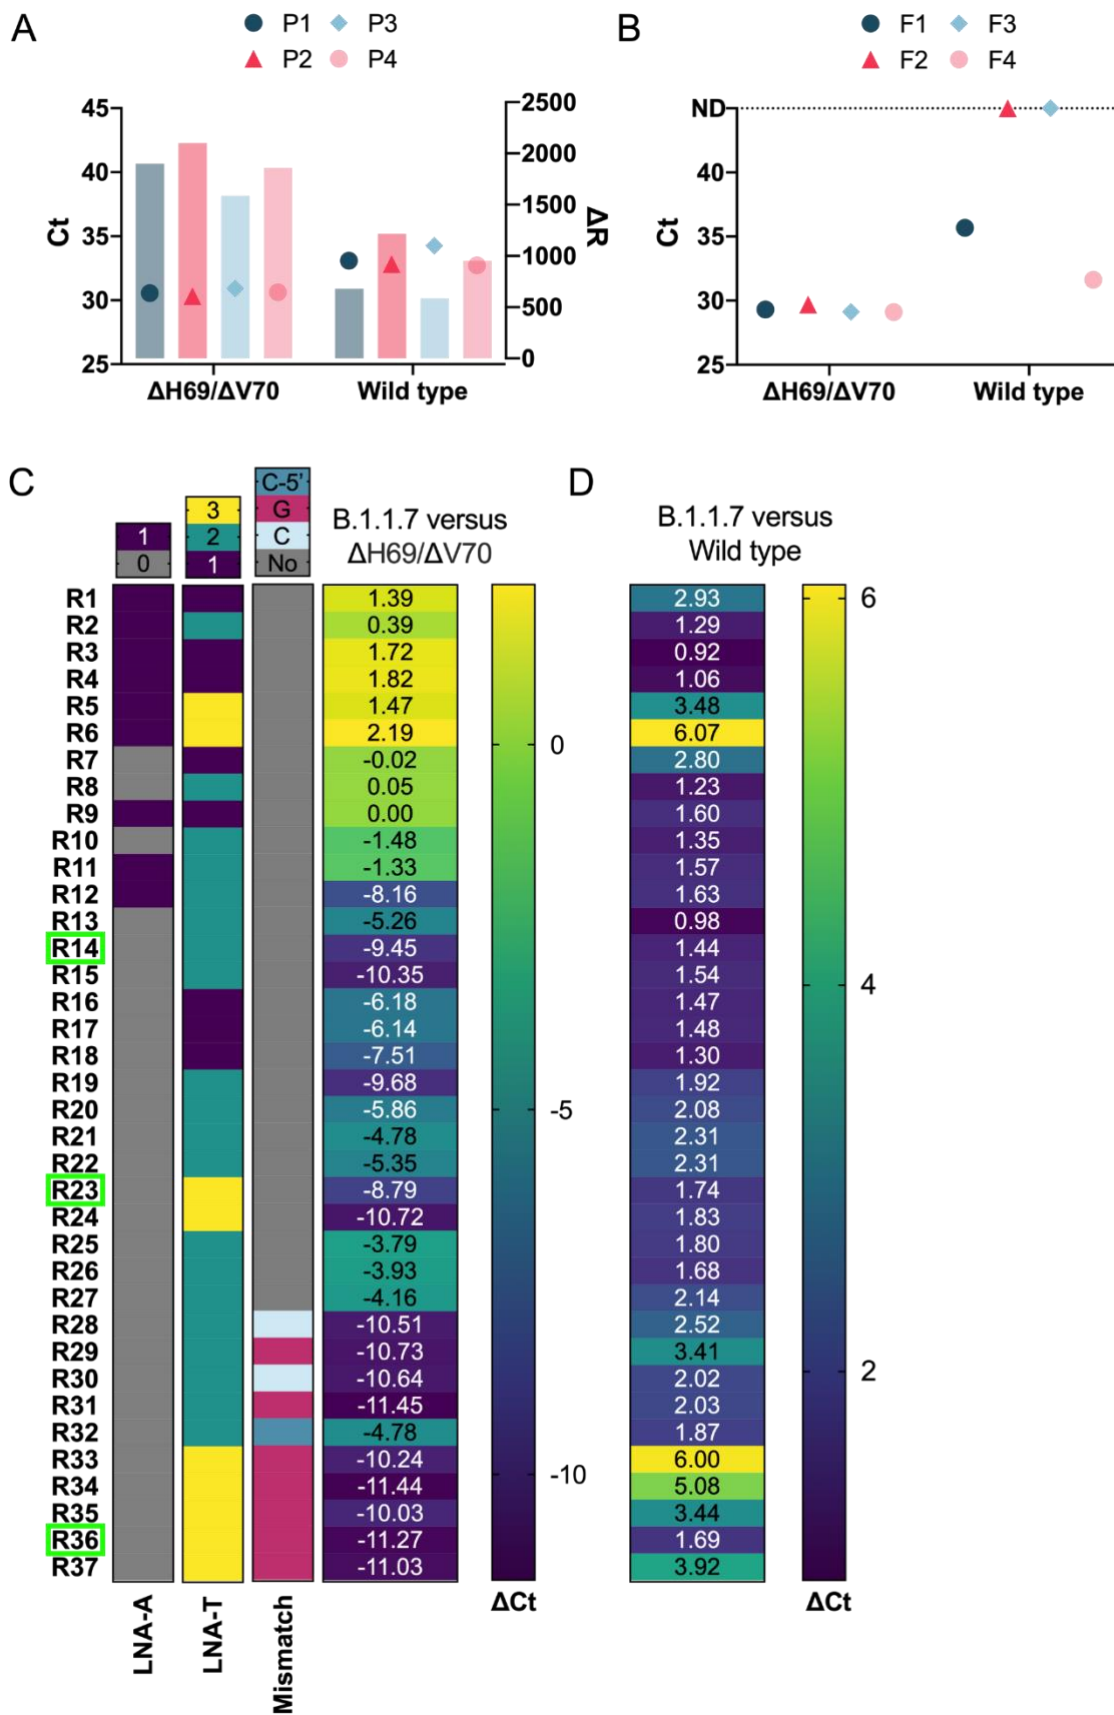

**Figure 2. Development and optimization of a spike gene primer/probe set specific for the B.1.1.7 SARS-CoV-2 variant.**

**A)** Comparison of probes (P1-4) targeting the  $\Delta$ H69/ $\Delta$ V70 deletion in B.1.1.7 using the best forward and reverse primers from the SARS-CoV-2 S gene primer/probe set (from **Figure 1/Table 2**). The performance between  $\Delta$ H69/ $\Delta$ V70 deletion template and wild type template is depicted by comparing Ct values (colored symbols) and fluorescence intensity ( $\Delta$ R, colored bars). **B)** Assessment of forward primers (F1-4) targeting the  $\Delta$ H69/ $\Delta$ V70 deletion in B.1.1.7 using the best reverse primer and probe (from **Figure 1/Table 2**). Symbols compare Ct values of the  $\Delta$ H69/ $\Delta$ V70 variant and wild type templates. Dotted line indicates samples that were not detected (ND) within 45 cycles. **C)** Overview of reverse primer designs targeting the  $\Delta$ Y144 deletion of the B.1.1.7 variant and their effects on specificity by comparing the relative  $\Delta$ Ct when amplifying either B.1.1.7 or  $\Delta$ H69/ $\Delta$ V70 variants as template. Darker colors in the heatmap represent a greater  $\Delta$ Ct and consequently better specificity. Green rectangle boxes indicate reverse primers selected for further optimization. LNA-A depicts primers containing an LNA modified adenine base located at either the 3'- or 5'-end of the reverse primer. LNA-T displays the number (1-3) of LNA-modified thymine bases for each reverse primer. Mismatch base represents design modifications to introduce either a guanine (G) or cytosine (C) mismatch base in either the penultimate base (G or C) or the 3<sup>rd</sup> from last base (C-5') relative to the 3'-end of the reverse primer. **D)** Heatmap shows  $\Delta$ Ct value comparison of B.1.1.7 primer/probe set to SARS-CoV-2 S gene primer/probe set using the B.1.1.7 variant as template. Darker colors indicate smaller  $\Delta$ Ct and consequently better specificity.



Figure 3.

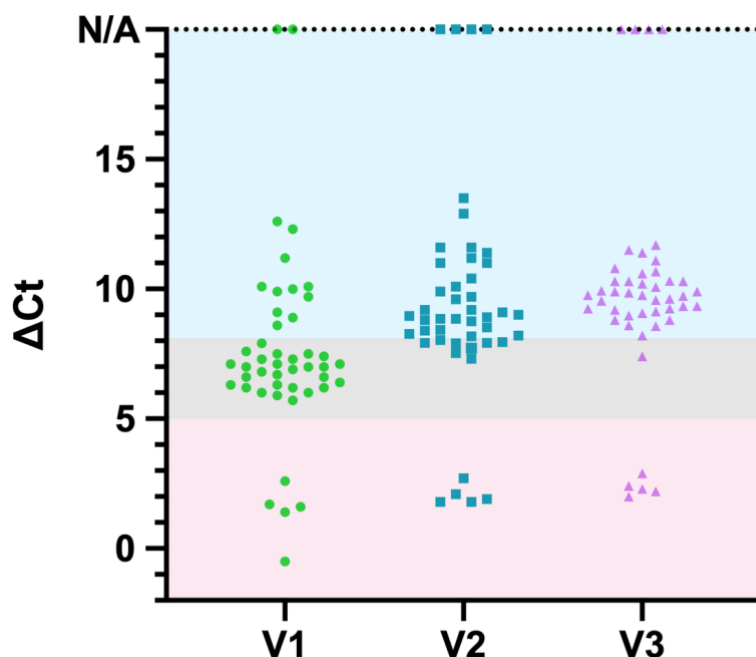

**Figure 3. Overview of B.1.1.7 assay performance on clinical samples.**

Three different versions (V1, V2, V3) of primer/probe sets for detection of the B.1.1.7 variant were directly compared on a selected panel of 46 SARS-CoV-2 positive clinical samples, some of which were confirmed B.1.1.7 and B.1.258 variants by sequencing.  $\Delta\text{Ct}$  values correspond to SARS-CoV-2 S gene assay Ct – B.1.1.7 assay Ct. Colored boxes within the plot define boundaries for corresponding variant interpretation, red ( $\Delta\text{Ct} \pm 5$ ) for B.1.1.7, blue ( $\Delta\text{Ct} 8-20$ ) for  $\Delta\text{H69}/\Delta\text{V70}$ , grey ( $\Delta\text{Ct} 5-8$ ) for inconclusive samples. N/A represents samples which were detected only in SARS-CoV-2 S gene assay and therefore are interpreted as consensus SARS-CoV-2.

**Figure 4.**

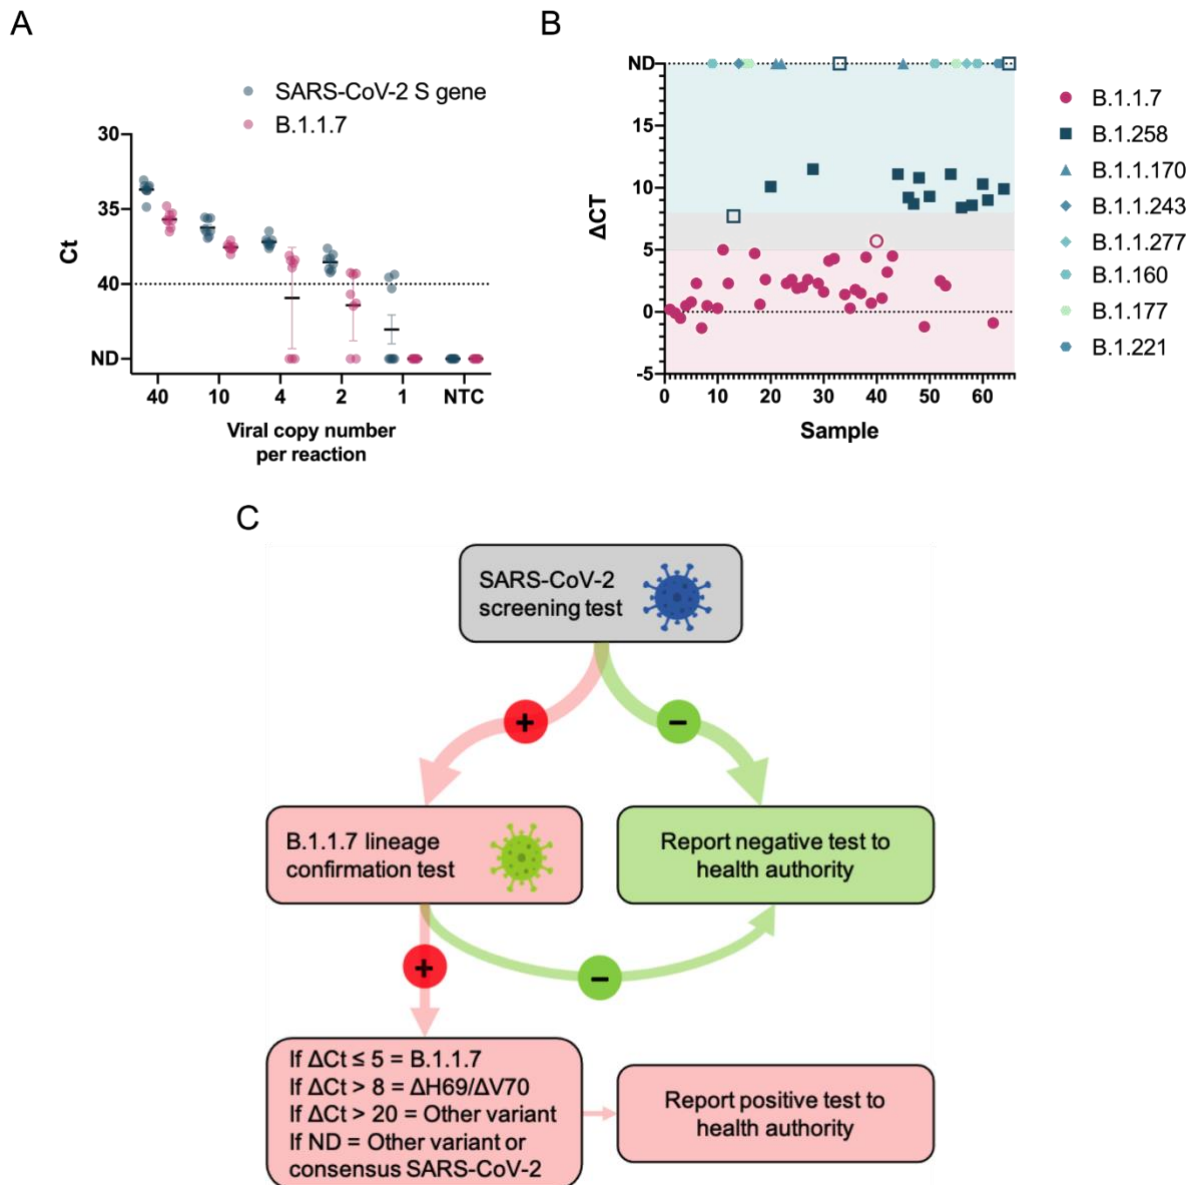

**Figure 4. Analytical sensitivity and clinical validation of SARS-CoV-2 S gene and B.1.1.7 assays.**

**A)** The limit of detection was determined for both SARS-CoV-2 S gene and B.1.1.7 assays by serial dilutions of isolated viral B.1.1.7 RNA. Data depict the mean and SD of eight replicates per each dilution. The dotted line at Ct 40 serves as a threshold after which amplification is considered invalid. **B)** Overview of  $\Delta Ct$  values (= SARS-CoV-2 S gene assay Ct. – B.1.1.7 assay Ct) for each sample in the clinical validation. Symbols represent the various SARS-CoV-2 lineages that were identified by sequencing. Closed symbols represent samples correctly identified by either the SARS-CoV-2 S gene or B.1.1.7 assays, whereas open symbols denote samples that did not meet the criterion established for variant identification. The shaded background shows  $\Delta Ct$  ranges that correspond with the criterion to report a sample as B.1.1.7 positive (pink),  $\Delta H69/\Delta V70$  deletion positive (teal), and inconclusive (gray). ND, not detected. **C)** Decision tree demonstrating the proper workflow, interpretation criterion, and actions to implement the SARS-CoV-2 S gene and B.1.1.7 assays a testing regime to identify B.1.1.7 positive samples.
